# Supplementary material for: In-cell architecture of the nuclear pore and snapshots of its turnover
Source: Springer Nature journal article supplement (doi:10.1038/s41586-020-2670-5), 2020-09-02

## Supplementary information

---

# In-cell architecture of the nuclear pore and snapshots of its turnover

---

In the format provided by the  
authors and unedited

Extended Data Fig. 7a

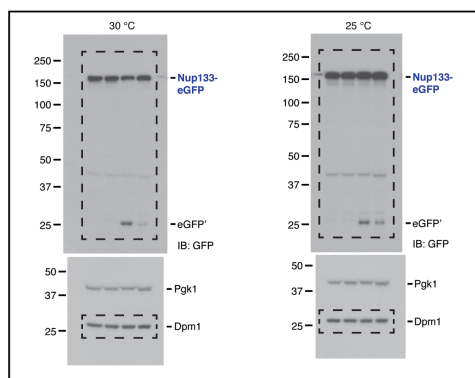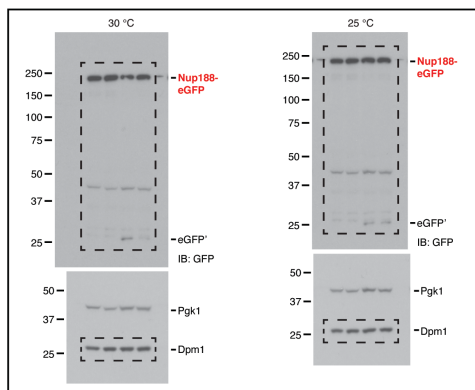

Supplement: 41586_2020_2670_MOESM1_ESM.pdf [file 41586_2020_2670_MOESM1_ESM.pdf]
